# Supplementary material for: Metal-Ion-Doped Manganese Halide Hybrids with Tunable Emission for Advanced Anti-Counterfeiting
Source: Nanomaterials (Basel). 2023 Jun 20;13(12):1890. doi: 10.3390/nano13121890 (PMC10305547; doi:10.3390/nano13121890)
Supplement: Supplementary file 1 [file nanomaterials-13-01890-s001.zip › nanomaterials-2467519-supplementary.pdf]

## **Metal-ion-doped Manganese Halide Hybrids with Tunable Emission for Advanced Anti-Counterfeiting**

### **Experimental Section**

**Materials:** Zinc acetate dihydrate ( $\text{ZnAc}_2$ , 99.9%), lead acetate ( $\text{PbAc}_2$ , 99.99%), manganese acetate ( $\text{MnAc}_2$ , 98%),  $\beta$ -phenylethylamine (PEA, 98%), tetra octyl ammonium bromide (TOAB, 98%), dodecylbenzene sulfonic acid (DBSA, 90%) and octanoic acid (OTAc, 99%) were purchased from Aladdin. Lead bromide ( $\text{PbBr}_2$ , 99.99%) was purchased from Macklin. Manganese (II) bromide ( $\text{MnBr}_2$ , 97%) was purchased from Strem. Bromotrimethylsilane (TMSBr, 97%) was purchased from J&K. Oleic acid (OA, 85%) was purchased from TCI. Xylene (95%) and hexane (97%) were purchased from Kermel.

**Synthesis of  $\text{PEA}_2\text{MnBr}_4$ :** 0.2 mmol of  $\text{MnAc}_2$ , 80  $\mu\text{L}$  PEA, 0.3 mL DBSA, 0.2 mL OTAc and 5 mL ODE were placed into a 10 mL three-necked flask. Then, the flask was subjected to vacuum-nitrogen three times and heated to 80  $^\circ\text{C}$  to dissolve. After that, the flask was heated to 140  $^\circ\text{C}$ , and 150  $\mu\text{L}$  TMSBr was injected into the flask. 5 s later, the solution was cooled by an ice-water bath. The crude solution was centrifugated at 5000 rpm for 3 min. After centrifugation, the precipitate was washed with xylene twice and dried under vacuum.

**Synthesis of  $\text{PEA}_2\text{Mn}_{0.88}\text{Zn}_{0.12}\text{Br}_4$ :** The synthetic procedure of  $\text{PEA}_2\text{Mn}_{0.88}\text{Zn}_{0.12}\text{Br}_4$  was similar to that of pure  $\text{PEA}_2\text{MnBr}_4$ , except the addition of  $\text{ZnAc}_2$ . The new addition of  $\text{MnAc}_2$  and  $\text{ZnAc}_2$  are 0.0294 and 0.0066 g.

---

**Synthesis of Pb<sup>2+</sup>-doped PEA<sub>2</sub>Mn<sub>0.88</sub>Zn<sub>0.12</sub>Br<sub>4</sub> by hot injection method:** The synthetic procedure of Pb-doped PEA<sub>2</sub>Mn<sub>0.88</sub>Zn<sub>0.12</sub>Br<sub>4</sub> was similar to that of PEA<sub>2</sub>Mn<sub>0.88</sub>Zn<sub>0.12</sub>Br<sub>4</sub>, except the addition of PbAc<sub>2</sub>. The new addition of MnAc<sub>2</sub>, ZnAc<sub>2</sub> and PbAc<sub>2</sub> are 0.0277, 0.0044 and 0.0065 g.

**Synthesis of Pb<sup>2+</sup>-doped PEA<sub>2</sub>Mn<sub>0.88</sub>Zn<sub>0.12</sub>Br<sub>4</sub> by cation exchange method:** 0.0037g PbBr<sub>2</sub> and 0.0109g TOAB were dissolved in 0.2 mL xylene to form lead bromide precursor. Then the lead bromide precursor was dropped into 3 mL of PEA<sub>2</sub>Mn<sub>0.88</sub>Zn<sub>0.12</sub>Br<sub>4</sub> solution (0.124 g PEA<sub>2</sub>Mn<sub>0.88</sub>Zn<sub>0.12</sub>Br<sub>4</sub> in 5 mL xylene). The solution was stirred for 10 min at room temperature. Then, the solution was subjected to centrifuge at 5000 rpm for 5 min. 5mL of Xylene was added to the precipitate, and then centrifuged at 5000 rpm for 5 min. After that, hexane was added to wash the precipitate.

**Characterization:** The PL and PLE spectra were conducted by a FLS920P spectrometer. The absolute PLQYs and time-resolved PL decays of the samples were measured by a fluorescence spectrometer (FLS920P, Edinburgh Instruments). The Fourier transform infrared (FTIR) spectrum was conducted on a Thermo-Nicole iS50 FTIR spectrometer with attenuated total reflection detector. The Inductively coupled plasma optical emission spectrometry (ICP-OES) measurements were measured by an ICP Optima 8300. X-ray photoelectron spectroscopy (XPS) was recorded on a Thermo Scientific K-Alpha spectrometer. The X-ray diffraction (XRD) measurements were measured on a Rigaku Smart Lab 9 kW. Field emission scanning electron microscope (FESEM) images were acquired using ZEISS Sigma 500.

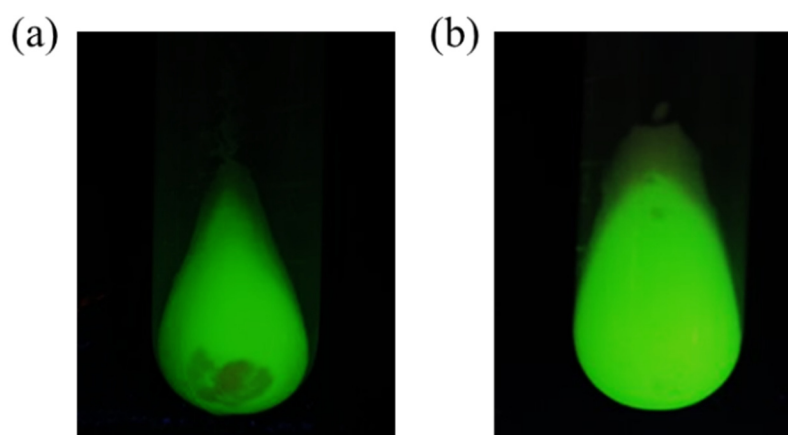

Figure S1 (a)The photograph of  $\text{PEA}_2\text{MnBr}_4$  synthesized with DBSA. (b) The photograph of  $\text{PEA}_2\text{MnBr}_4$  synthesized with DBSA and OTAc.

Table S1. Concentration ratio of  $\text{Zn}^{2+}$  in the products by ICP-OES

| Sample (feed ratio % of $\text{Zn}^{2+}$ )    | ICP-OES (atomic ratio % of $\text{Zn}^{2+}$ )              |
|-----------------------------------------------|------------------------------------------------------------|
| $\{[\text{Zn}]/([\text{Zn}] + [\text{Mn}])\}$ | $\{[\text{Zn}] / ([\text{Zn}] + [\text{Mn}])\} \times 100$ |
| 5                                             | 4.6                                                        |
| 15                                            | 12.3                                                       |
| 25                                            | 23.6                                                       |
| 35                                            | 32.9                                                       |
| 50                                            | 45.7                                                       |

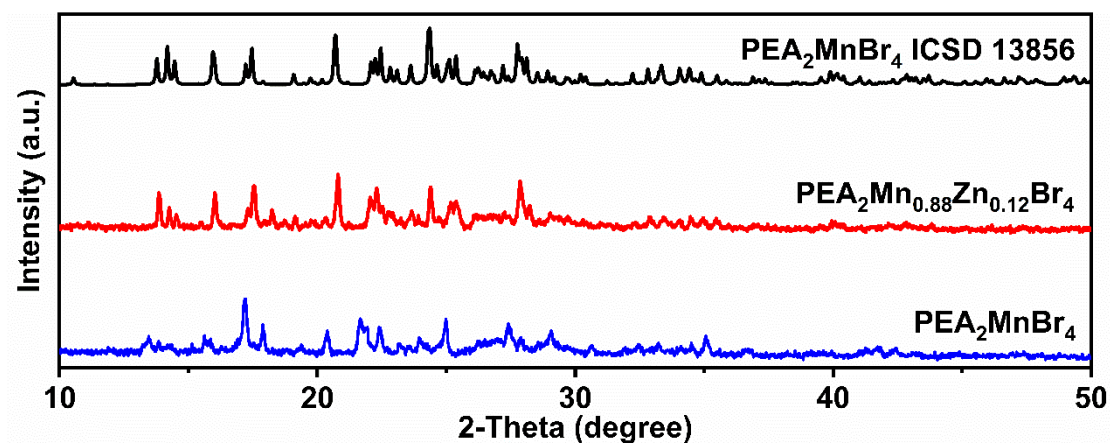

Figure S2 XRD patterns of  $\text{PEA}_2\text{MnBr}_4$  and  $\text{PEA}_2\text{Mn}_{0.88}\text{Zn}_{0.12}\text{Br}_4$

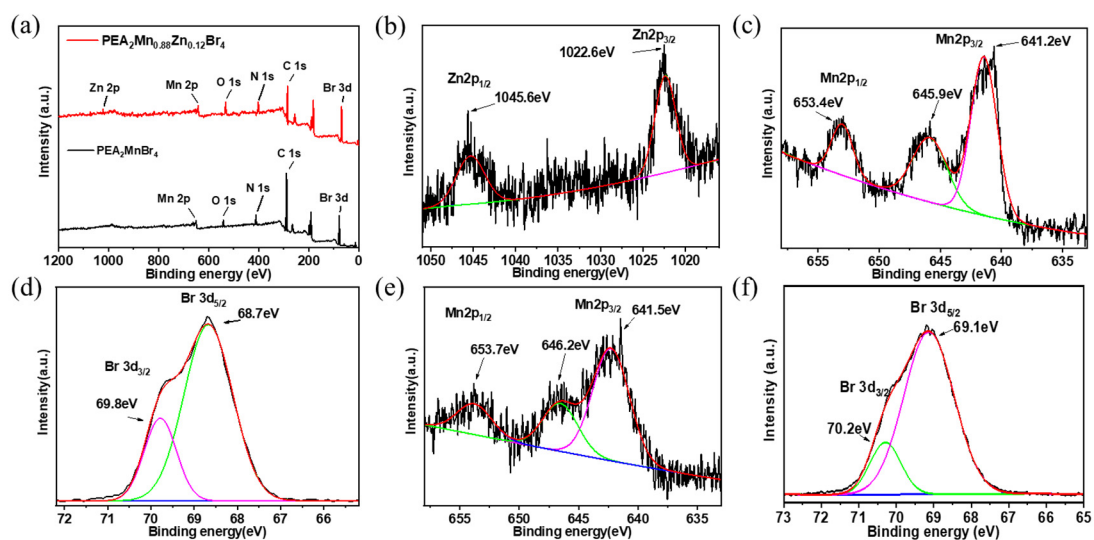

Figure S3 (a) XPS survey spectra of  $\text{PEA}_2\text{MnBr}_4$  and  $\text{PEA}_2\text{Mn}_{0.88}\text{Zn}_{0.12}\text{Br}_4$ . High-resolutions XPS spectra of Zn2p (b) Mn2p (c) and Br3d (d) in  $\text{PEA}_2\text{Mn}_{0.88}\text{Zn}_{0.12}\text{Br}_4$ . HR-XPS spectra of Mn2p (e) and Br3d (f) in  $\text{PEA}_2\text{MnBr}_4$ .

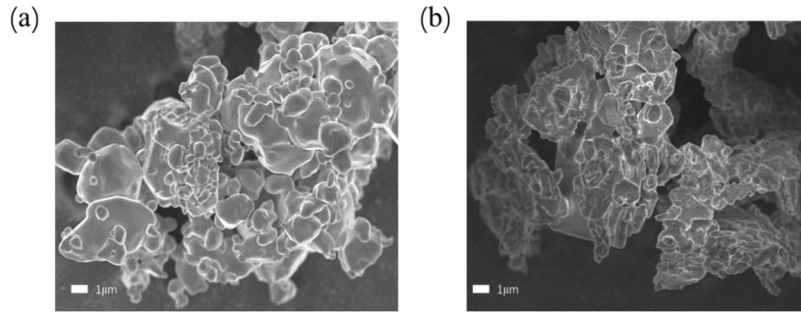

Figure S4 SEM images of  $\text{PEA}_2\text{MnBr}_4$  (a) and  $\text{PEA}_2\text{Mn}_{0.88}\text{Zn}_{0.12}\text{Br}_4$  (b).

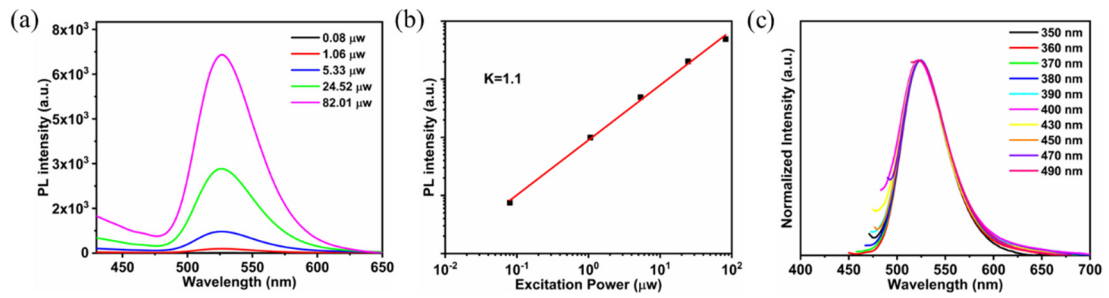

Figure S5 (a) Excitation power-dependent PL spectra for an excitation wavelength of 365 nm. (b) Integrated PL intensities for the emission centered at 528 nm of the  $\text{PEA}_2\text{Mn}_{0.88}\text{Zn}_{0.12}\text{Br}_4$  in relation to the excitation power (0.08-82  $\mu\text{W}$ ). (c) Excitation wavelength-dependent PL spectra of  $\text{PEA}_2\text{Mn}_{0.88}\text{Zn}_{0.12}\text{Br}_4$ .

Table S2. Excitation and crystal field parameters for  $\text{PEA}_2\text{MnBr}_4$  and  $\text{PEA}_2\text{Mn}_{0.88}\text{Zn}_{0.12}\text{Br}_4$

| Sample                                 | $\text{PEA}_2\text{MnBr}_4$ | $\text{PEA}_2\text{Mn}_{0.88}\text{Zn}_{0.12}\text{Br}_4$ |
|----------------------------------------|-----------------------------|-----------------------------------------------------------|
| ${}^4\text{E(D)}$ (nm)                 | 375.8                       | 376.1                                                     |
| ${}^4\text{A}_1, {}^4\text{E(G)}$ (nm) | 437                         | 439                                                       |
| ${}^4\text{T}_1(\text{G})$ (nm)        | 468                         | 468.2                                                     |
| B ( $\text{cm}^{-1}$ )                 | 532.4                       | 544.2                                                     |
| C ( $\text{cm}^{-1}$ )                 | 3511.9                      | 3467.4                                                    |
| E <sub>2</sub> ( $\text{cm}^{-1}$ )    | 21367.5                     | 21358.4                                                   |
| Dq ( $\text{cm}^{-1}$ )                | 327.5                       | 343.3                                                     |

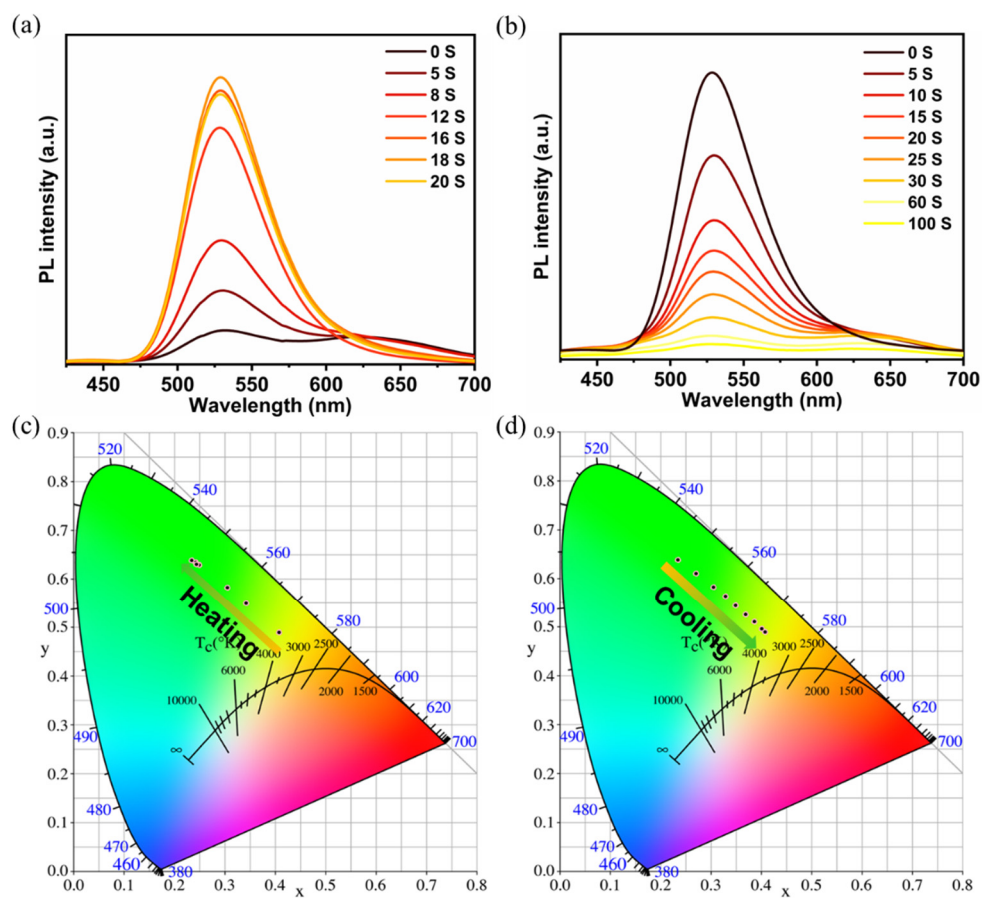

Figure S6 PL spectra of  $\text{PEA}_2\text{Mn}_{0.88}\text{Zn}_{0.12}\text{Br}_4$  during heating process (a) and cooling process (b). The transformation of  $\text{PEA}_2\text{Mn}_{0.88}\text{Zn}_{0.12}\text{Br}_4$  in CIE color coordinates during heating process (c) and cooling process (d).

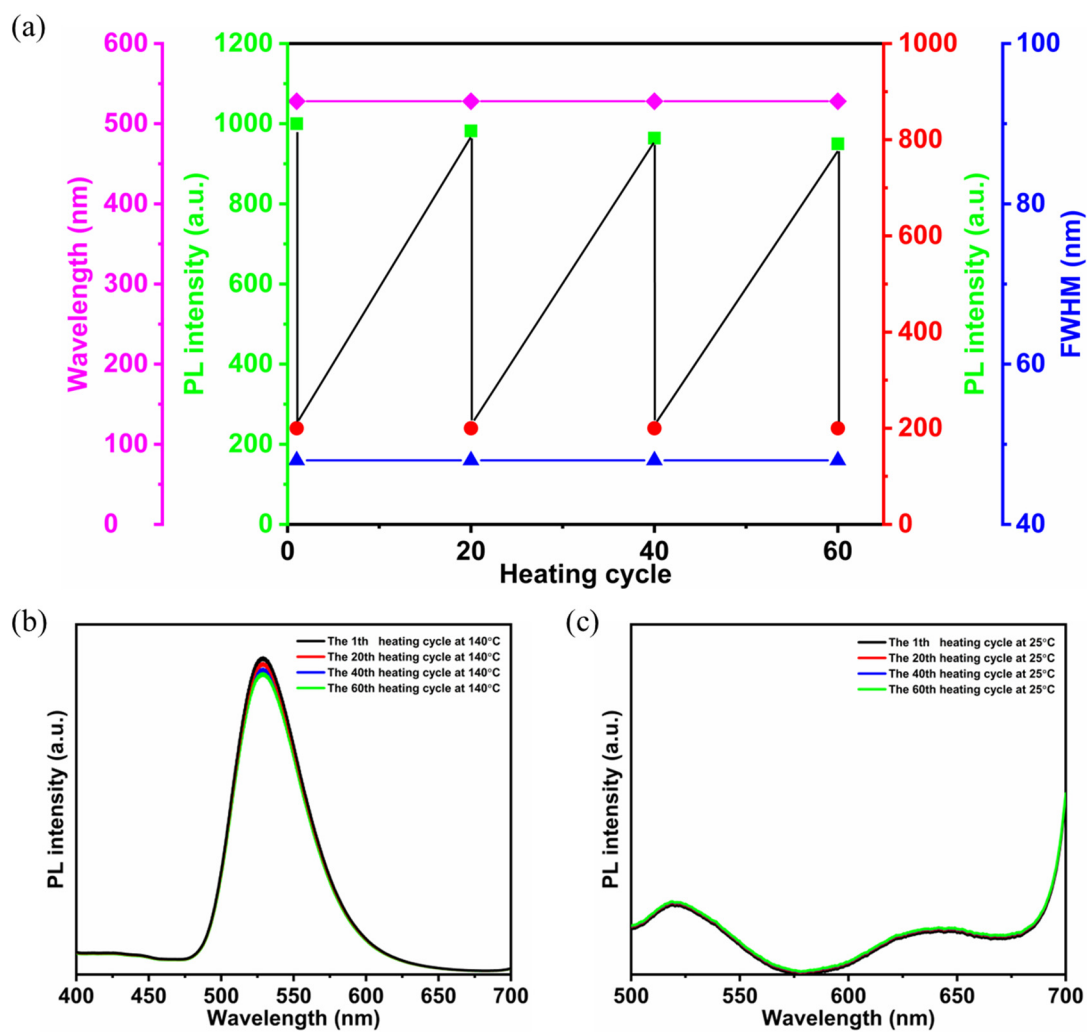

Figure S7 (a) FWHM, PL intensity and emission peaks of  $\text{PEA}_2\text{Mn}_{0.88}\text{Zn}_{0.12}\text{Br}_4$  during 60 heating - cooling cycles. PL spectra of the  $\text{PEA}_2\text{Mn}_{0.88}\text{Zn}_{0.12}\text{Br}_4$  at 140 °C (b) and 25 °C (c) at different heating and cooling cycles.

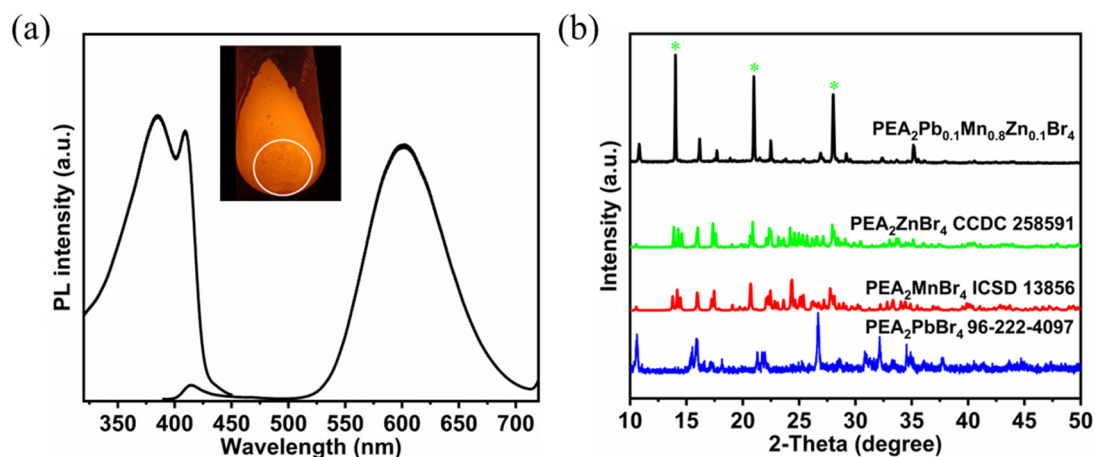

Figure S8 (a) PL and PLE spectrum (b) XRD pattern of  $\text{PEA}_2\text{Pb}_{0.1}\text{Mn}_{0.8}\text{Zn}_{0.1}\text{Br}_4$

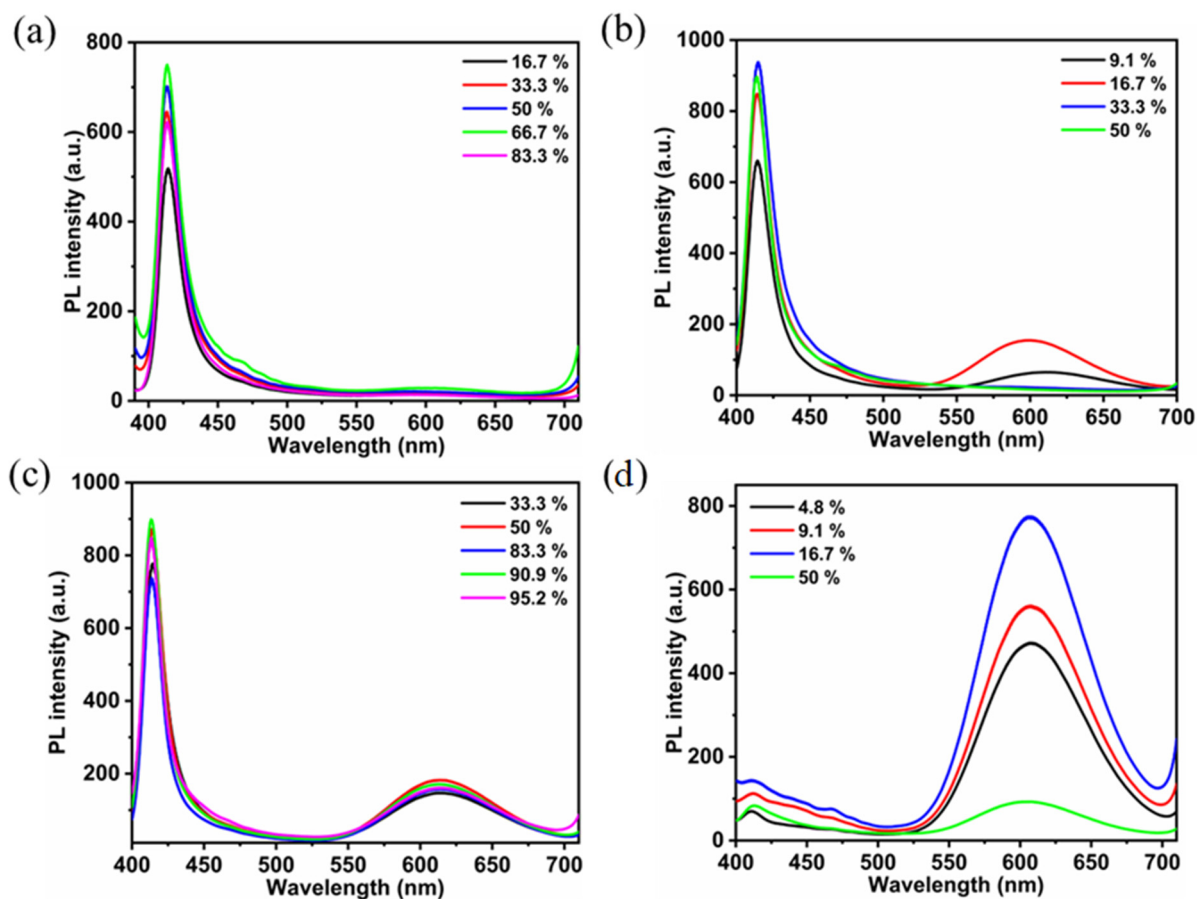

Figure S9 PL spectra of  $\text{PEA}_2\text{PbBr}_4$  with different amounts of (a)  $\text{MnAc}_2$  and (b)  $\text{MnBr}_2$ . (c) PL spectra of  $\text{PEA}_2\text{PbBr}_4$  with different amounts of  $\text{PEA}_2\text{MnBr}_4$ . (d) PL spectra of  $\text{PEA}_2\text{MnBr}_4$  with different amounts of  $\text{PbBr}_2$ .

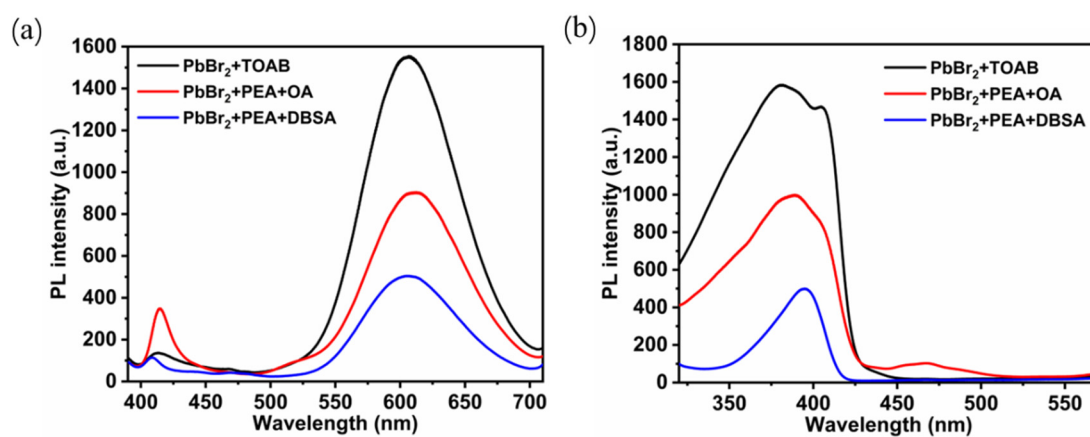

Figure S10 (a) PL and (b) PLE spectra of  $\text{PEA}_2\text{MnBr}_4$  with  $\text{PbBr}_2$  dissolved by different ligands.

TableS3. Concentration ratio of  $\text{Mn}^{2+}$ ,  $\text{Zn}^{2+}$  and  $\text{Pb}^{2+}$  in the products by ICP-OES

| Sample<br>(feed ratio % of $\text{Pb}^{2+}$ ) | Element | atomic ratio % of |                                    |                                    |
|-----------------------------------------------|---------|-------------------|------------------------------------|------------------------------------|
|                                               |         | $\text{Mn}^{2+}$  | atomic ratio % of $\text{Zn}^{2+}$ | atomic ratio % of $\text{Pb}^{2+}$ |
| 6.3                                           |         | 81.2              | 11.9                               | 6.9                                |
| 9.1                                           |         | 78.9              | 11.7                               | 9.4                                |
| 16.7                                          |         | 72.6              | 10.6                               | 16.8                               |
| 88.9                                          |         | 10.8              | 1.6                                | 87.6                               |
| 95.2                                          |         | 5.8               | 0.5                                | 93.7                               |

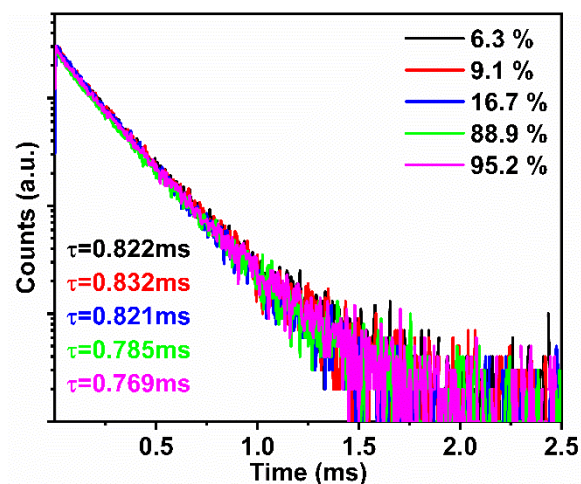

Figure S11 Decay curves of  $\text{PEA}_2\text{Mn}_{0.88}\text{Zn}_{0.12}\text{Br}_4$  doping  $\text{Pb}^{2+}$  in different levels.

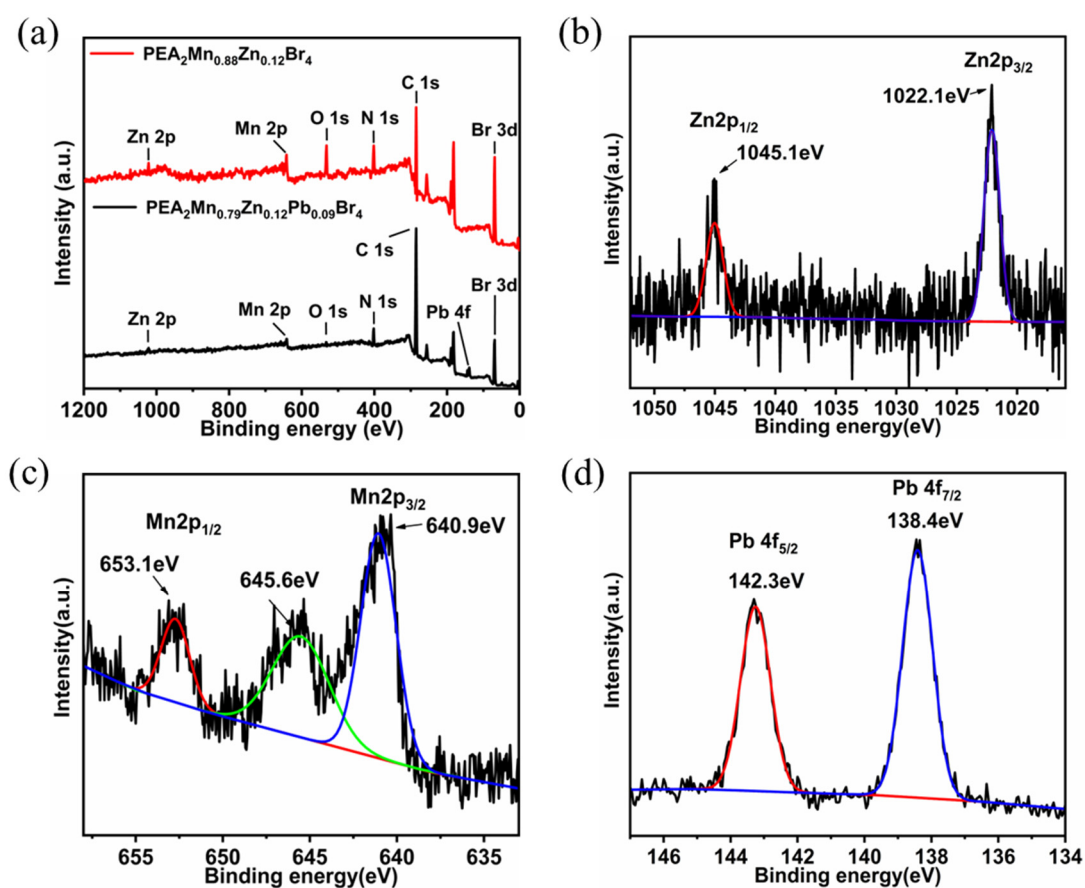

Figure S12 (a) XPS survey spectra of  $\text{PEA}_2\text{Mn}_{0.79}\text{Zn}_{0.12}\text{Pb}_{0.09}\text{Br}_4$  and  $\text{PEA}_2\text{Mn}_{0.88}\text{Zn}_{0.12}\text{Br}_4$ . High-resolutions

XPS spectra of Zn2p (b) Mn2p (c) Pb4f (d) in  $\text{PEA}_2\text{Mn}_{0.79}\text{Zn}_{0.12}\text{Pb}_{0.09}\text{Br}_4$ .

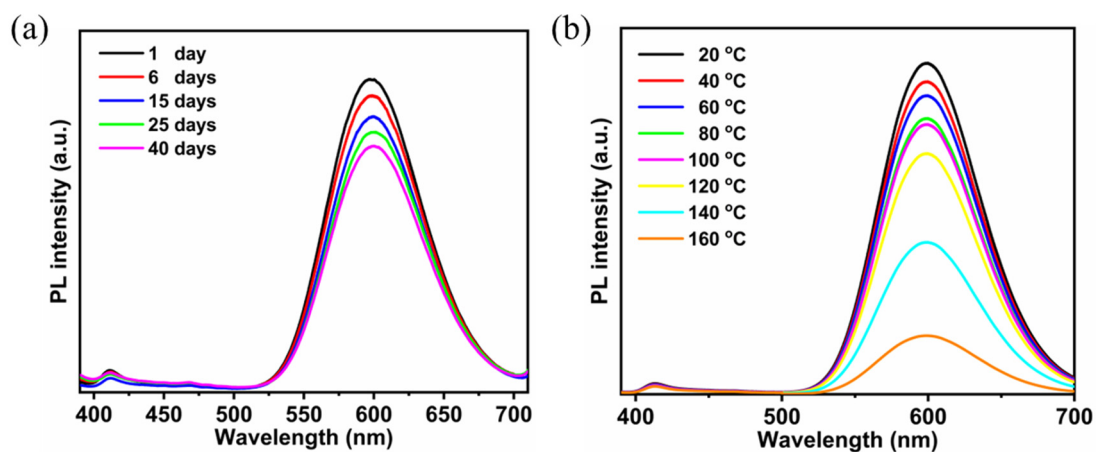

Figure S13 Air stability (a) and thermal stability (b) of  $\text{PEA}_2\text{Mn}_{0.79}\text{Zn}_{0.12}\text{Pb}_{0.09}\text{Br}_4$ .

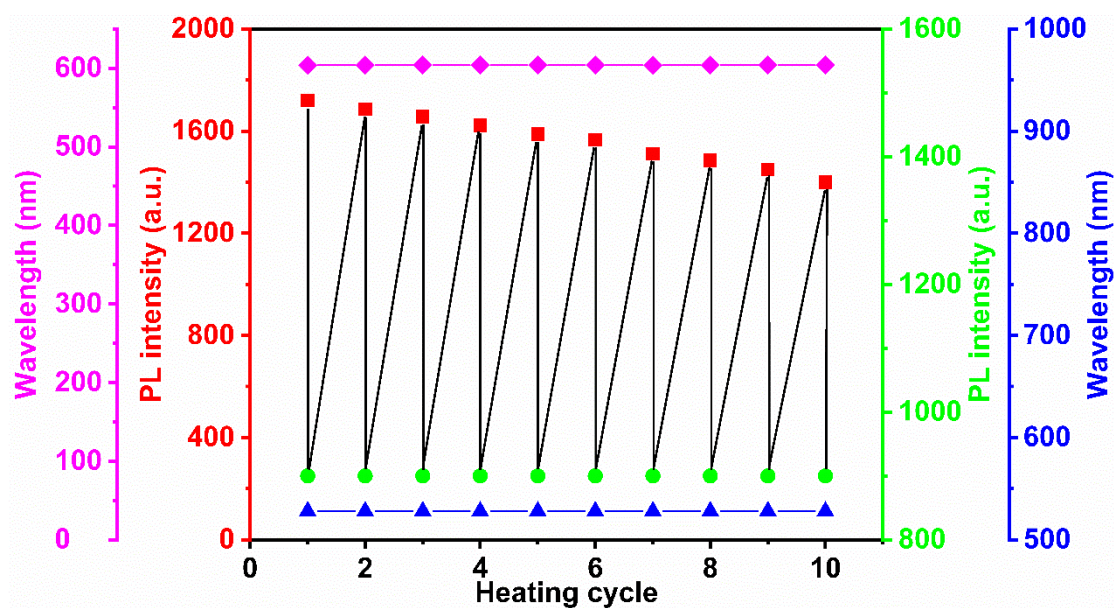

Figure S14 PL intensity and emission peaks of the multilayer composite fluorescent film during 10 heating - cooling cycles.
